# Supplementary material for: Hepatitis B virus inhibits intrinsic RIG-I and RIG-G immune signaling via inducing miR146a
Source: PubMed Central journal article supplement (PMC4876503; doi:10.1038/srep26150), 2016-05-23
Supplement: srep26150-s1.pdf [file srep26150-s1.pdf]

## Supplementary Information

Hepatitis B virus inhibits intrinsic RIG-I and RIG-G immune signaling via inducing  
miR146a

Zhaohua Hou, Jian Zhang, Qiuju Han, Chenhe Su, Jing Qu, Dongqing Xu,  
Cai Zhang, Zhigang Tian

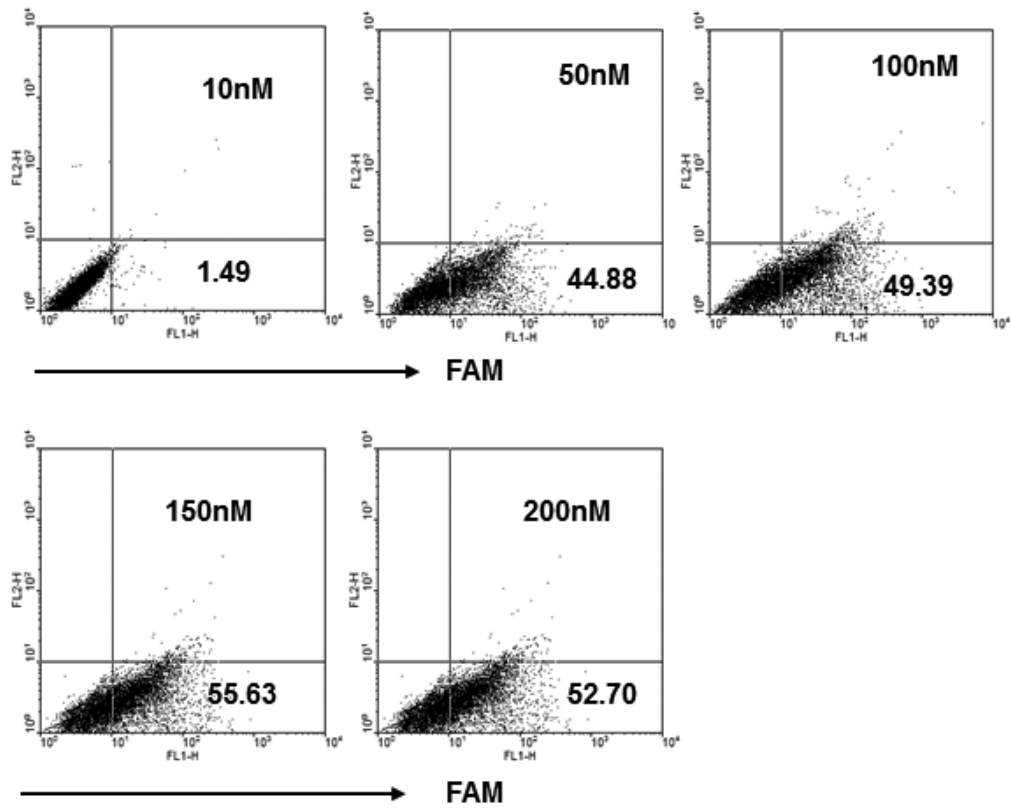

Fig. S1 Transfection efficiency of FAM-labeled miRNA mimics at the concentrations of 10nM, 50nM, 100nM, 150nM and 200nM by Lipofectamine 2000 in HepG2 cells.

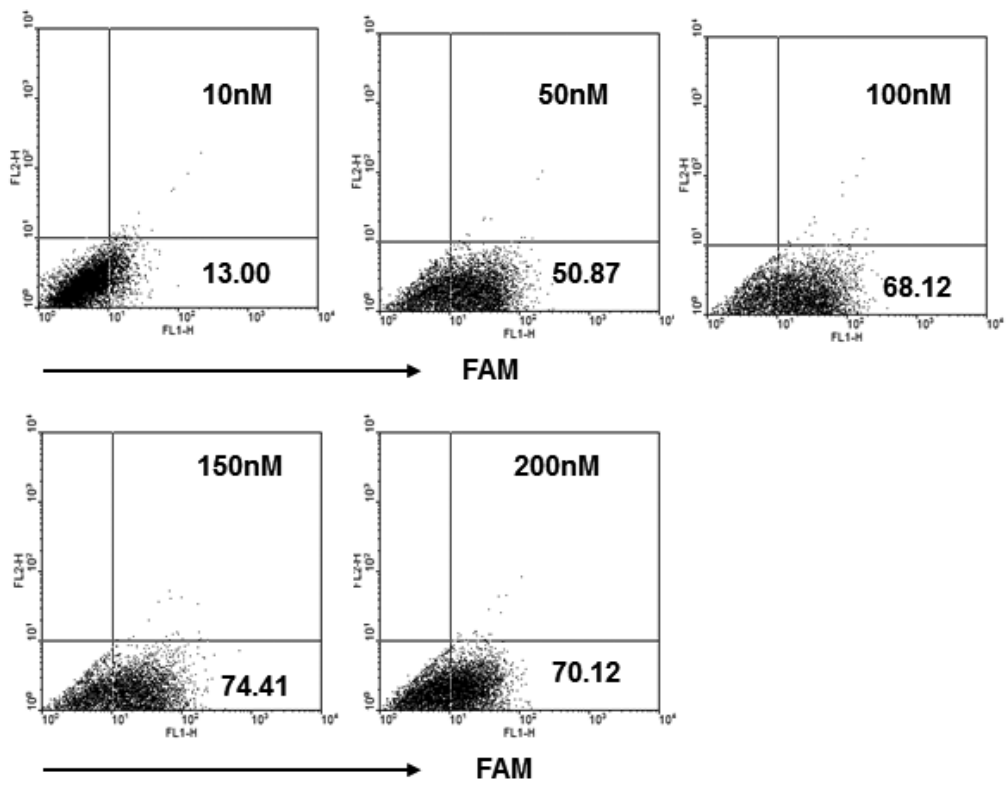

Fig. S2 Transfection efficiency of FAM-labeled miRNA inhibitors at the concentration of 10nM, 50nM, 100nM, 150nM, 200nM by Lipofectamine 2000 in HepG2.2.15 cells.

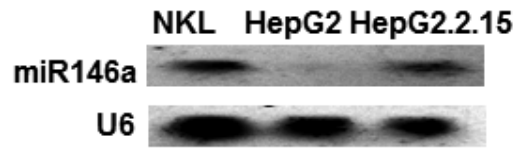

**Fig. S3.** Mature miR146a amount in HepG2 and HepG2.2.15 cells. miR146a was directly measured by an RPA assay. The NKL cell line was used as a positive control, and U6 was used as the loading control.

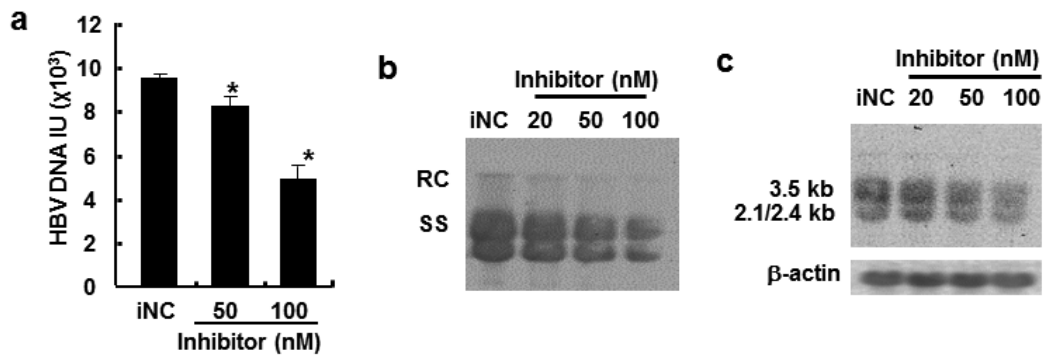

**Fig. S4. miR146a reduced HBV load *in vitro*.** HepG2.2.15 cells were transfected with miR146a mimics/inhibitors at doses ranging from 20–100 nM. (a) After 48 hours, HBV DNA load was determined by qRT-PCR. Data are expressed as the mean  $\pm$ SD from at least 3 independent experiments. \* $p < 0.05$ : versus control vector or the RNA-transfected negative control group. (b, c) Total HBV DNA and RNA levels were analyzed by (b) Southern blotting and (c) Northern blotting with the same HBV probe respectively. Human  $\beta$ -actin was used as a loading control for the Northern blot experiment.

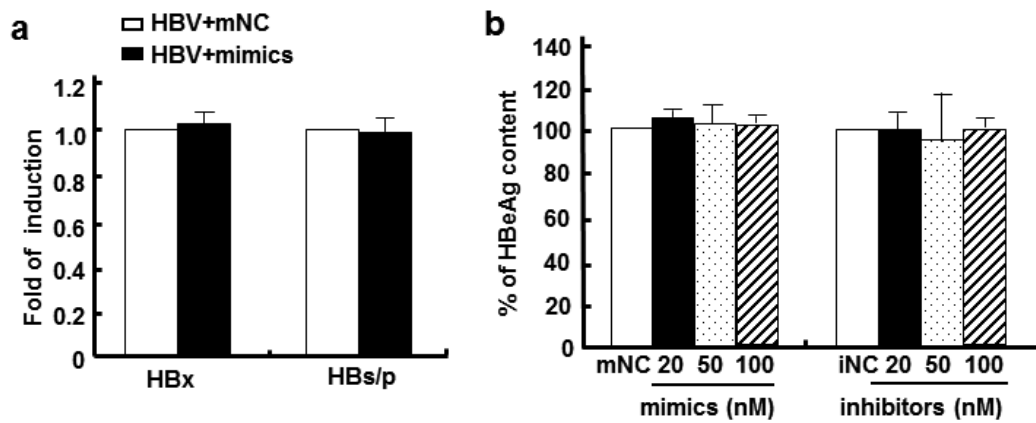

**Fig. S5. miR146b had no impact on HBV transcription and translation.** (a)

HepG2 cells were co-transfected with pAAV-HBV1.2 plasmid (1  $\mu\text{g}/\text{mL}$ ) and 20 nM miR146b mimics or negative control (mNC). Then, HBx and HBs/p mRNA levels were measured by qRT-PCR 48 hours later. (b) HepG2.2.15 cells were transfected with miR-146b mimics/inhibitors at doses ranging from 20–100 nM, and HBeAg levels were measured by ELISA 48 hours after treatment. Data are expressed as the mean  $\pm$ SD from at least 3 independent experiments. \* $p < 0.05$ : versus control-RNA-transfected group.

**Table S1** Clinical profiles of study subjects

|               | <b>No.1</b> | <b>No.2</b> | <b>No.3</b> | <b>No.4</b> | <b>No.5</b> | <b>No.6</b> | <b>No.7</b> | <b>No.8</b> |
|---------------|-------------|-------------|-------------|-------------|-------------|-------------|-------------|-------------|
| Age           | 49          | 68          | 65          | 62          | 57          | 45          | 58          | 65          |
| Gender        | Male        | Male        | Male        | Male        | Male        | Male        | Male        | Male        |
| HBV Infection | +           | +           | +           | +           | -           | -           | -           | -           |
| ALT           | 34          | 27          | 60          | 52          | 48          | 38          | 45          | 26          |

No. 1-4, HBV<sup>+</sup> HCC patients; No. 5-7, HBV<sup>-</sup> HCC patients; No. 8, ICC patient.

**Table S2** Sequences of primers used for real-time PCR analysis

| Target sequence                 | Sequence 5'→3'                                           | size (bp) |
|---------------------------------|----------------------------------------------------------|-----------|
| pre-hsa-miR146a <sup>[40]</sup> | F: CCGATGTGTATCCTCAGCTTTG<br>R: GCTGAAGAAGTGAATTCAGAGGTC | 79        |
| pri-hsa-miR146a <sup>[28]</sup> | F: TGAGAACTGAATTCATGGGTT<br>R: ATCTACTCTCTCCAGGTCCTCA    | 106       |
| hIFN- $\alpha$ <sup>[6]</sup>   | F: CTCCTTTCTCCTGCCTGAAG<br>R: AAGTGCTCATCCCAAGTAGC       | 170       |
| hIFN- $\beta$ <sup>[6]</sup>    | F: TGCTCTCCTGTTGTGCTTCTCC<br>R: CATCTCATAGATGGTCAATGCGG  | 222       |
| hTNF- $\alpha$ <sup>[6]</sup>   | F: ATCTTCTCGAACCCCGAGTGA<br>R: GAGGGCTGATTAGAGAGAGGTC    | 83        |
| hU6                             | F: CTCGCTTCGGCAGCACATA<br>R: AACGCTTCACGAATTGCG          | 94        |
| HBV x <sup>[6]</sup>            | F: CCGTCTGTGCCTTCTCATCTGC<br>R: ACCAATTTATGCCTACAGCCTCC  | 256       |
| HBV s/p <sup>[6]</sup>          | F: ATCCTGCTGCTATGCCTCATCTT<br>R: ACAGTGGGGGAAAGCCCTACGAA | 314       |
| mRIG-I                          | F: CCACCTACATCCTCAGCTACATGA<br>R: TGGGCCCTTGTTGTTCTTCT   | 86        |
| mRIG-G                          | F: CCTACATAAAGCACCTAGATGGC<br>R: ATGTGATAGTAGATCCAGGCGT  | 149       |
| hGAPDH <sup>[6]</sup>           | F: GAAGGTGAAGGTCGGAGT<br>R: CATGGGTGGAATCATATTGGAA       | 155       |



**Table S3** Bioinformatic analysis of interaction between miR146a and HBV genome

| HBV Genotype    | Predicted seed match |            |
|-----------------|----------------------|------------|
|                 | miR146a-5p           | miR146a-3p |
| adr(M38636.1)   | None                 | None       |
| ayr(NC003977.1) | None                 | None       |
| ayw (M57663.2)  | None                 | None       |
| ayw (U95551.1)  | None                 | None       |
